# Supplementary material for: A chiral rhenium complex with predicted high parity violation effects: synthesis, stereochemical characterization by VCD spectroscopy and quantum chemical calculations
Source: Royal Society of Chemistry journal article supplement (doi:10.1039/c3cp50199j), 2013-01-01
Supplement: c3cp50199j.pdf [file c3cp50199j.pdf]

Supplementary Material for PCCP  
This journal is (c) The Owner Societies 2013

## **SUPPORTING INFORMATION**

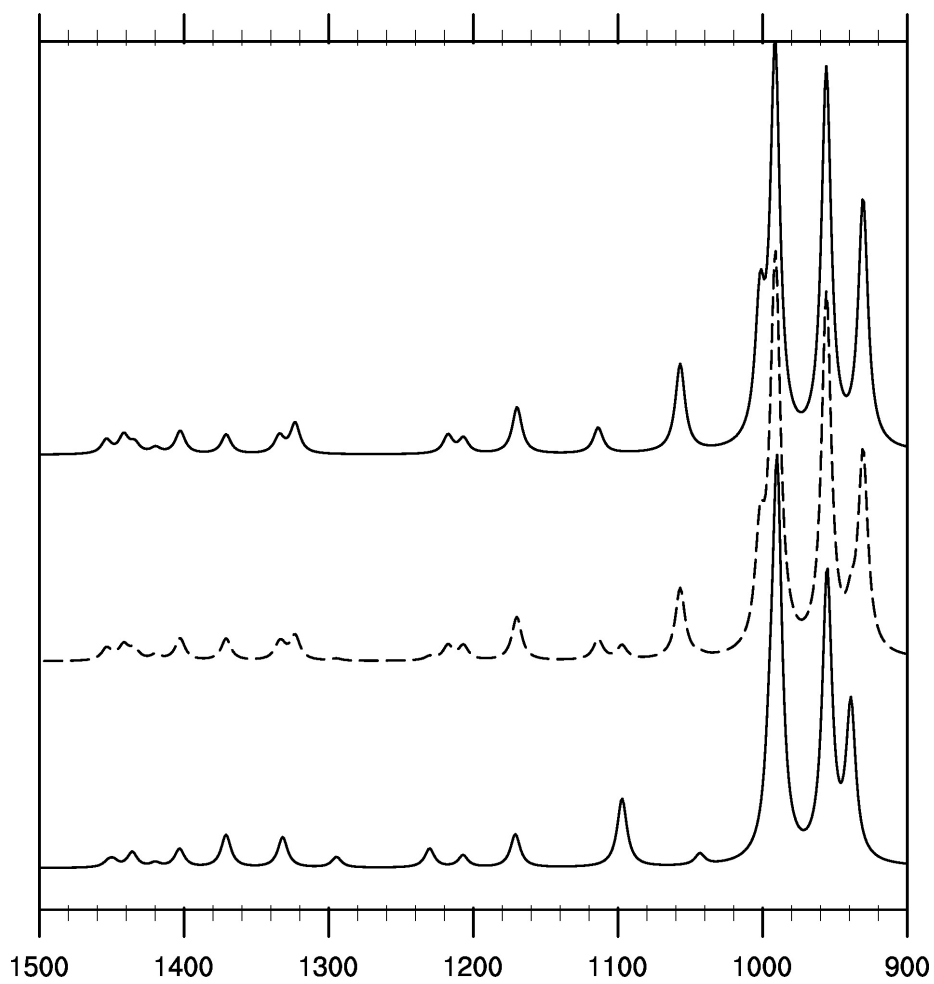

Figure S3-1: Simulated IR spectra (B3LYP; def2-TZVPP) for **3a-c1** (top), the Boltzmann-averaged **3a-c1/c2** (80%/20%; middle), **3a-c2** (bottom).

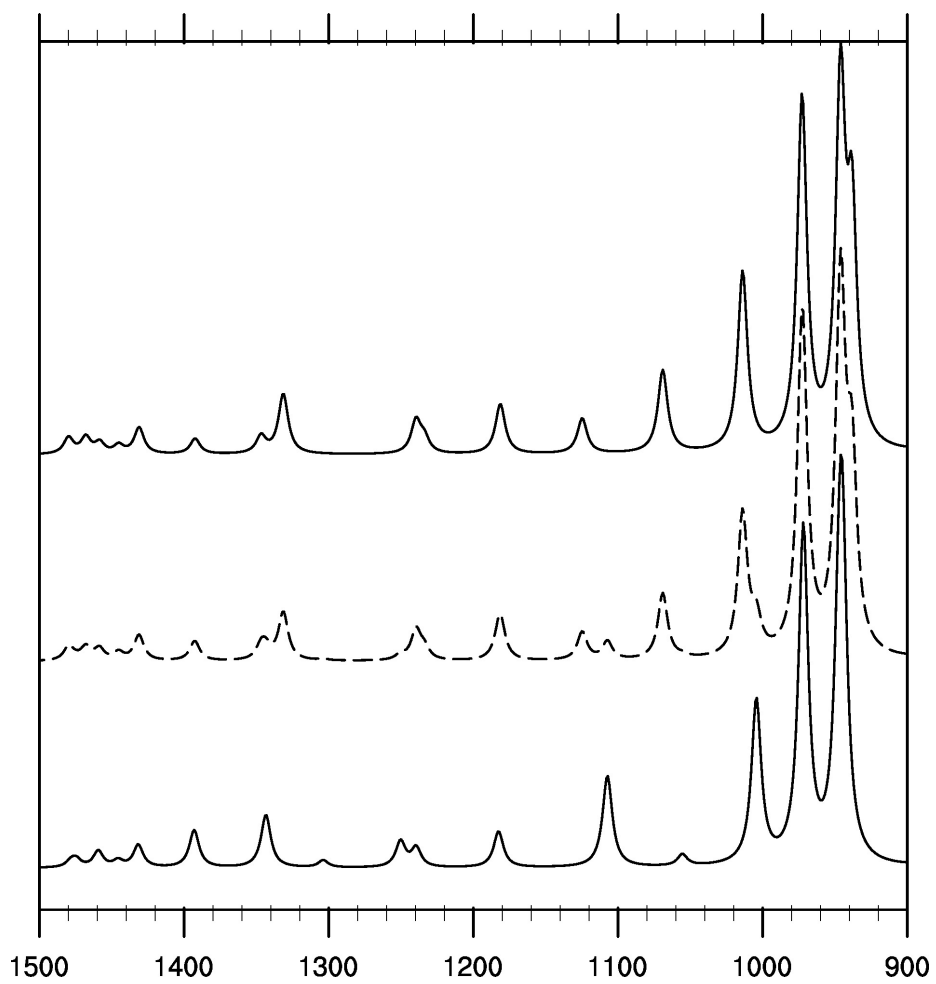

Figure S3-2: Simulated IR spectra (B3LYP; Stuttgart/6-31Gd) for **3a-c1** (top), the Boltzmann-averaged **3a-c1/c2** (80%/20%; middle), **3a-c2** (bottom).

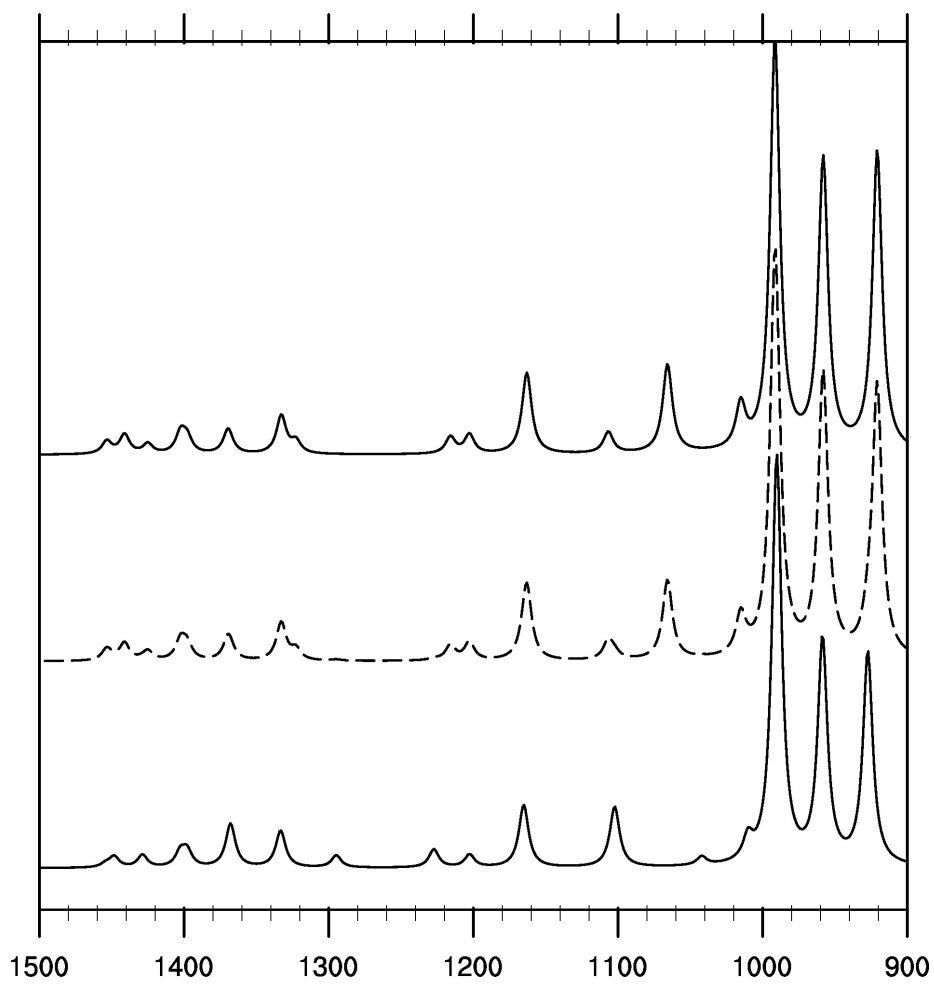

Figure S3-3: Simulated IR spectra (B3LYP; def2-TZVPP) for **3b-c1** (top), the Boltzmann-averaged **3b-c1/c2** (90%/10%; middle), **3b-c2** (bottom).

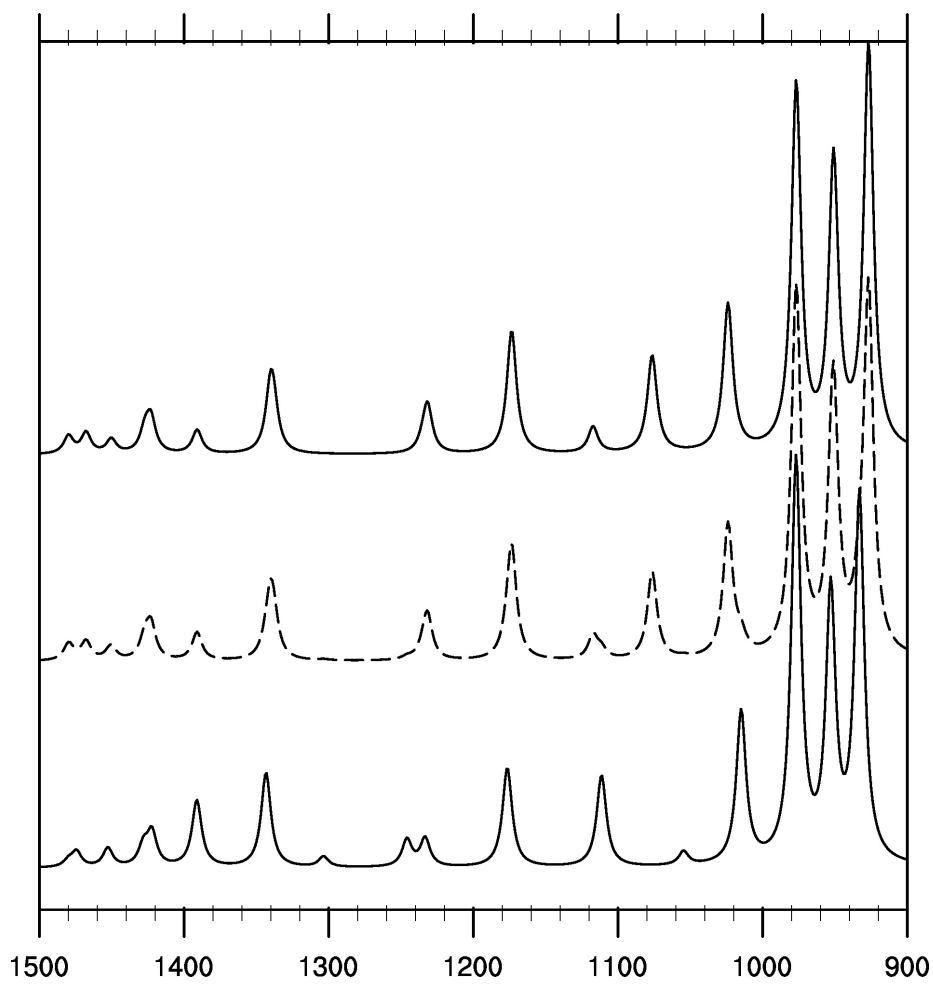

Figure S3-4: Simulated IR spectra (B3LYP; Stuttgart/6-31Gd) for **3b-c1** (top), the Boltzmann-averaged **3b-c1/c2** (90%/10%; middle), **3b-c2** (bottom).

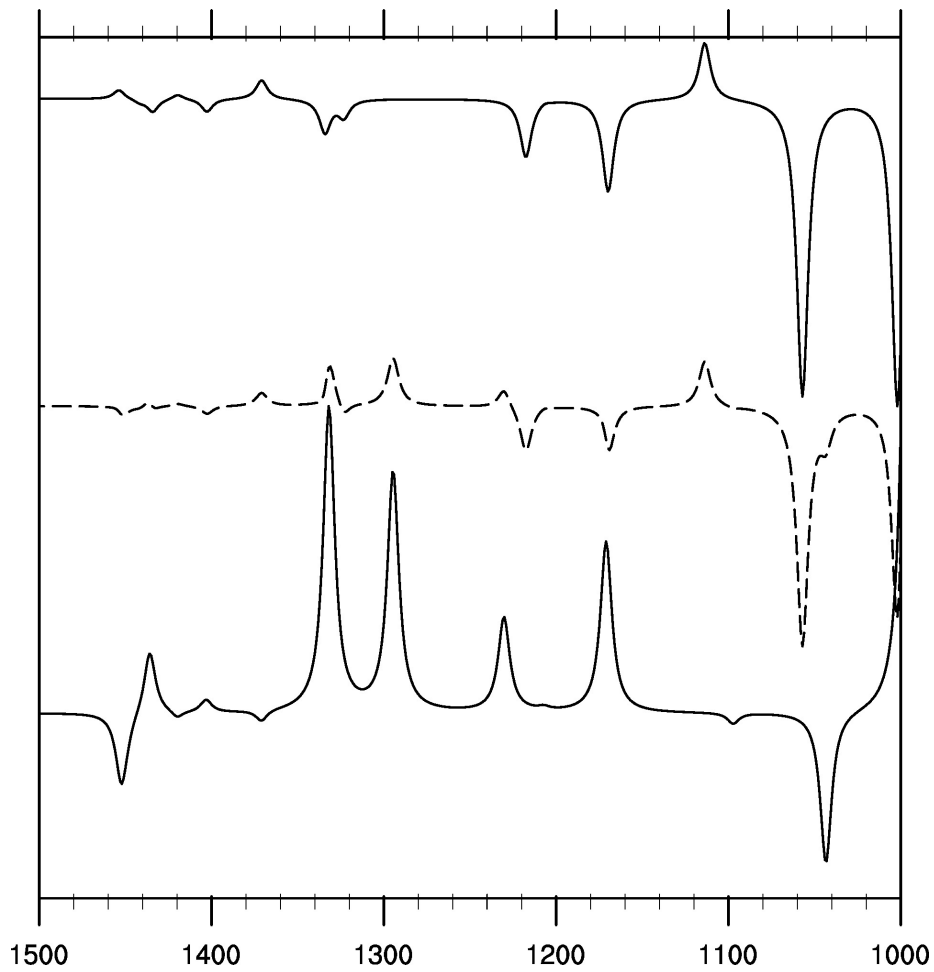

Figure S3-5: Simulated VCD spectra (B3LYP; def2-TZVPP) for **3a-c1** (top), the Boltzmann-averaged **3a-c1/c2** (80%/20%; middle), **3a-c2** (bottom).

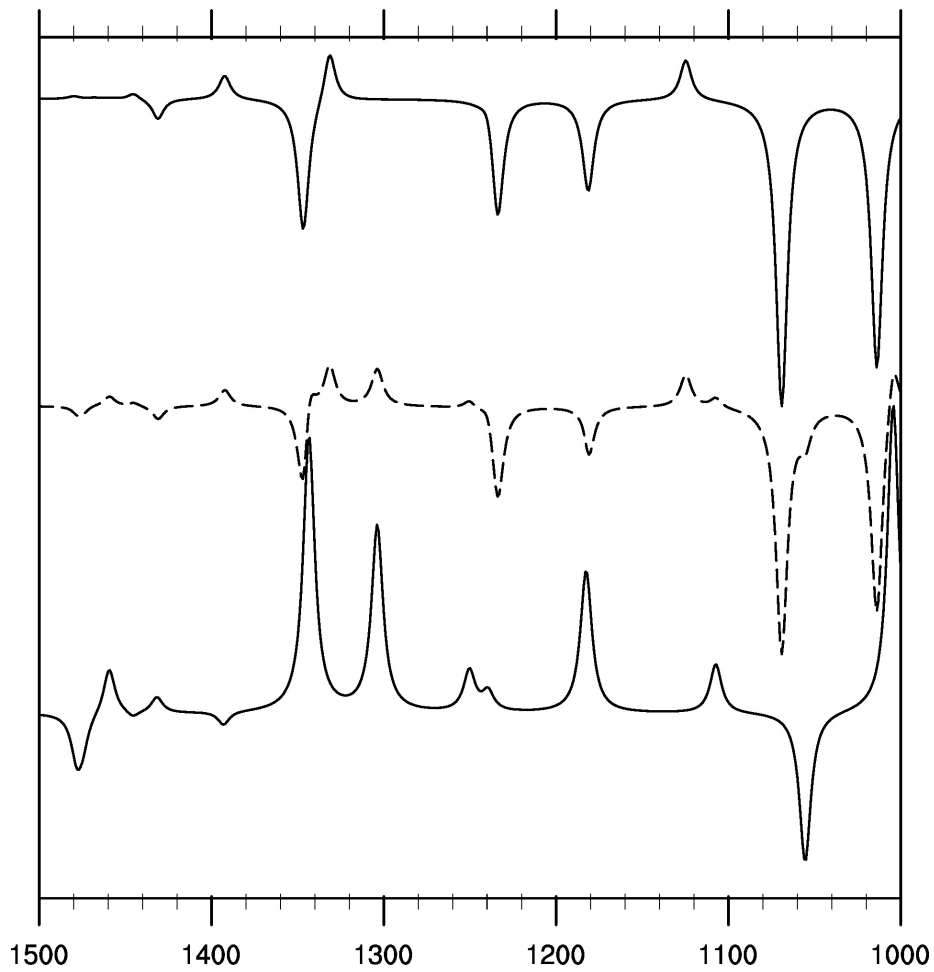

Figure S3-6: Simulated VCD spectra (B3LYP; Stuttgart/6-31Gd) for **3a-c1** (top), the Boltzmann-averaged **3a-c1/c2** (80%/20%; middle), **3a-c2** (bottom).

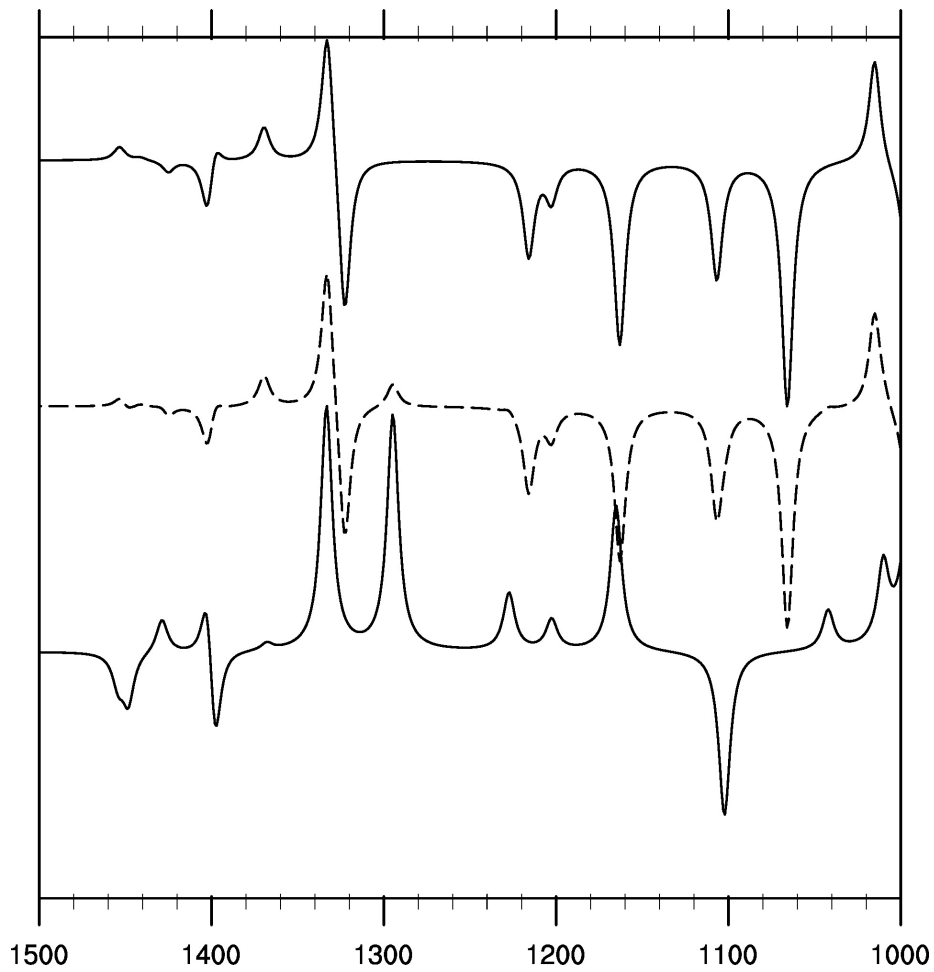

Figure S3-7: Simulated VCD spectra (B3LYP; def2-TZVPP) for **3b-c1** (top), the Boltzmann-averaged **3b-c1/c2** (90%/10%; middle), **3b-c2** (bottom).



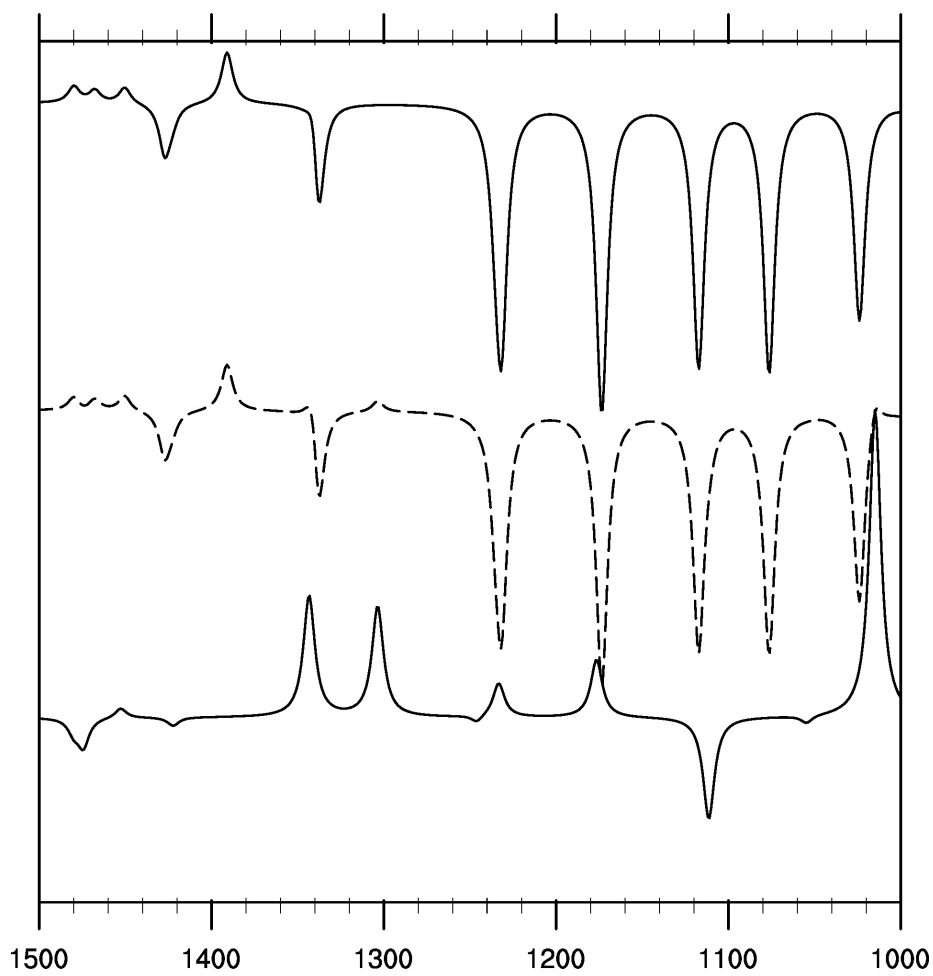

Figure S3-8: Simulated VCD spectra (B3LYP; Stuttgart/6-31Gd) for **3b-c1** (top), the Boltzmann-averaged **3b-c1/c2** (90%/10%; middle), **3b-c2** (bottom).
